# Supplementary material for: Celastrol protects against early brain injury after subarachnoid hemorrhage in rats through alleviating blood-brain barrier disruption and blocking necroptosis
Source: PubMed Central journal article supplement (PMC8266331; doi:10.18632/aging.203221), 2021-06-28
Supplement: aging-13-203221-s001.pdf [file aging-13-203221-s001.pdf]

## SUPPLEMENTARY TABLE

**Supplementary Table 1. Evaluation of the neurological score after SAH.**

| Test                                             | Score                      |                                         |                                                          |                                                   |
|--------------------------------------------------|----------------------------|-----------------------------------------|----------------------------------------------------------|---------------------------------------------------|
|                                                  | 0                          | 1                                       | 2                                                        | 3                                                 |
| <b>Spontaneous activity (in cage for 5 min)</b>  | No movement                | Barely moves                            | Moves but does not approach at least three sides of cage | Moves and approaches at least three sides of cage |
| <b>Symmetry in limb movement</b>                 | Right side: no movement    | Right side: slight movement             | Right side: moves slowly                                 | Both sides: move symmetrically                    |
| <b>Forepaw outstretching</b>                     | Right side: no outreaching | Right side: slight movement to outreach | Right side: moves and outreaches less than left side     | Symmetrical outreach                              |
| <b>Climbing</b>                                  | \                          | Fails to climb                          | Right side is weak                                       | Normal climbing                                   |
| <b>Response to touch on either side of trunk</b> | \                          | No response on right side               | Weak response on right side                              | Symmetrical response                              |
| <b>Response to vibrissae touch</b>               | \                          | No response on right side               | Weak response on right side                              | Symmetrical response                              |
